# Supplementary material for: Efficient synthesis of tetradecafluoro-4-phenylheptan-4-ol by a Cannizzaro-type reaction and application of the alcohol as a bulky Martin ligand variant for a new anti-apicophilic phosphorane
Source: Royal Society of Chemistry journal article supplement (doi:10.1039/c0dt00539h), 2010-01-01

*Dalton Transactions*

Supporting Information for

**Efficient synthesis of tetradecafluoro-4-phenylheptan-4-ol by a Cannizzaro-type reaction and application of the alcohol as a bulky Martin ligand variant for a new anti-apicophilic phosphorane**

**Xin-Dong Jiang, Shiro Matsukawa, Ken-ichiro Kakuda, Yuta Fukuzaki, Wei-Li Zhao, Lin-Song Li, Huai-Bin Shen, Satoshi Kojima and Yohsuke Yamamoto**

Table of Contents

|                                                                                                       |    |
|-------------------------------------------------------------------------------------------------------|----|
| Figure S1. Time course of the $^{19}\text{F}$ NMR signals of the conversion of <b>7b</b> to <b>8b</b> | S2 |
| Figure S2. Entry 1-4 in Table 1.                                                                      | S2 |
| Figure S3 Synthesis of <b>10a</b> by the reaction of <b>7a</b> with $\text{NaBH}_4$                   | S4 |
| Figure S4. Entry 1-6 in Table 2.                                                                      | S5 |
| Copies of $^1\text{H}$ , $^{19}\text{F}$ and $^{31}\text{P}$ NMR spectra                              | S8 |

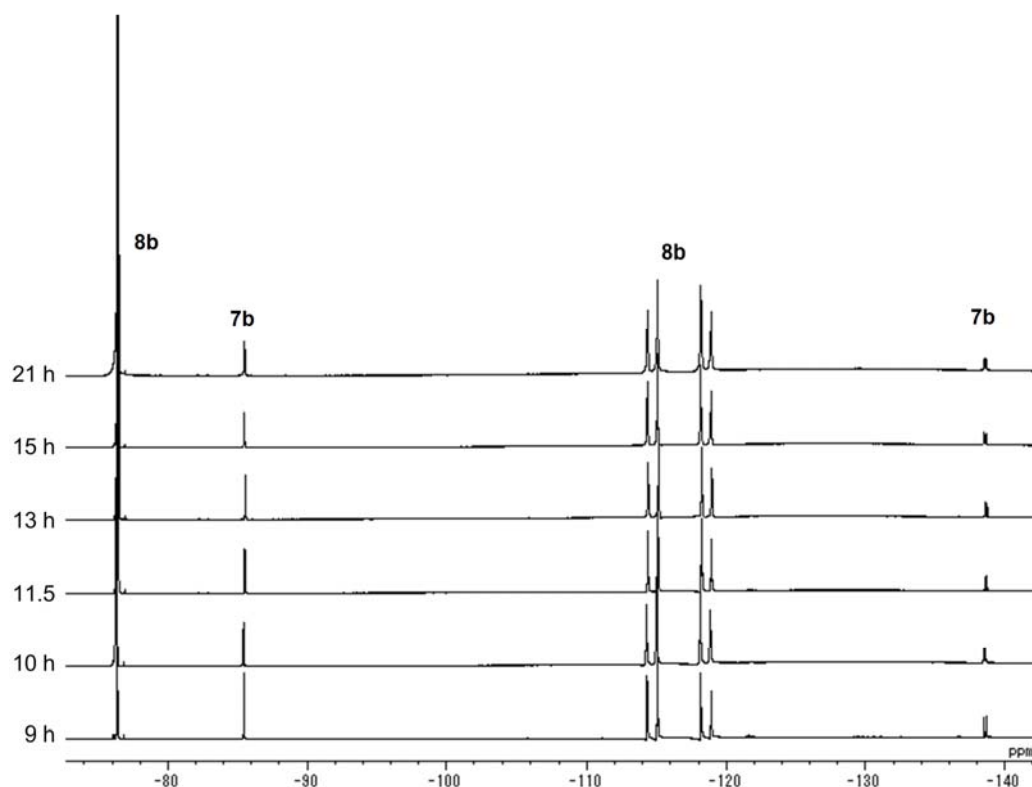

**Figure S1.** Time course of the  $^{19}\text{F}$  NMR signals of the conversion of **7b** to **8b** in THF at 25 °C. The reaction was basically complete in 15 h.

**Figure S2.** Entry 1-4 in Table 1.

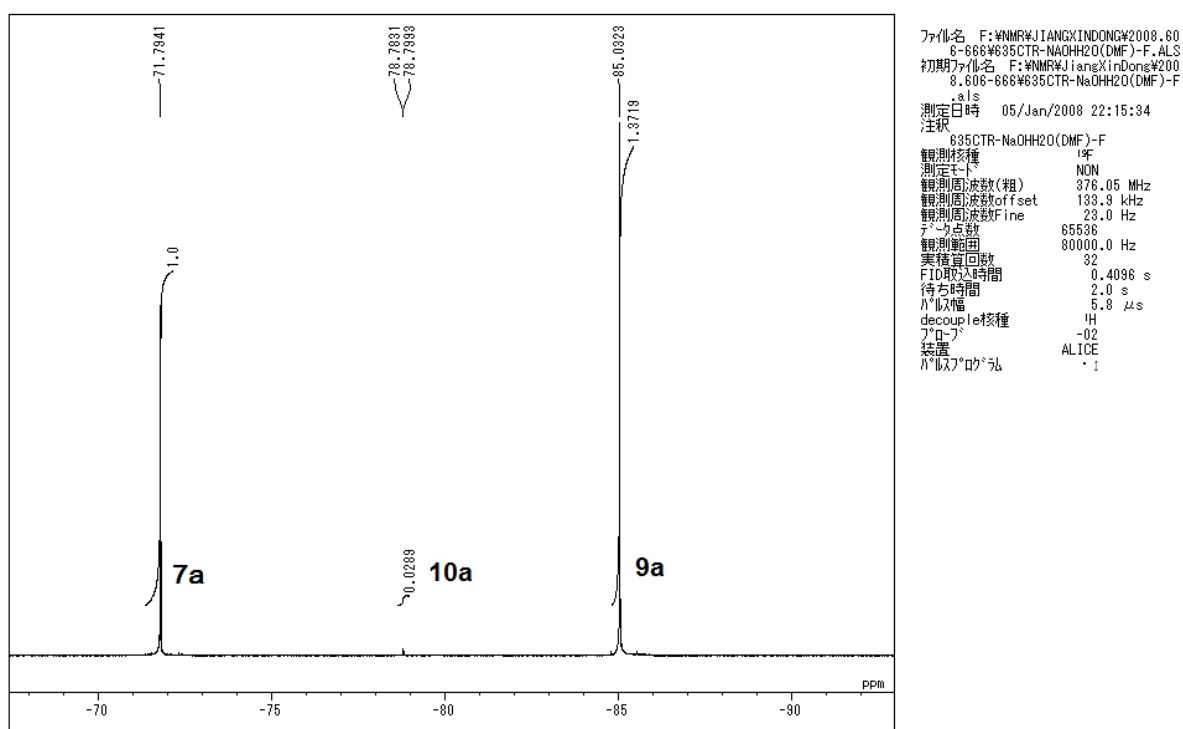

entry 1

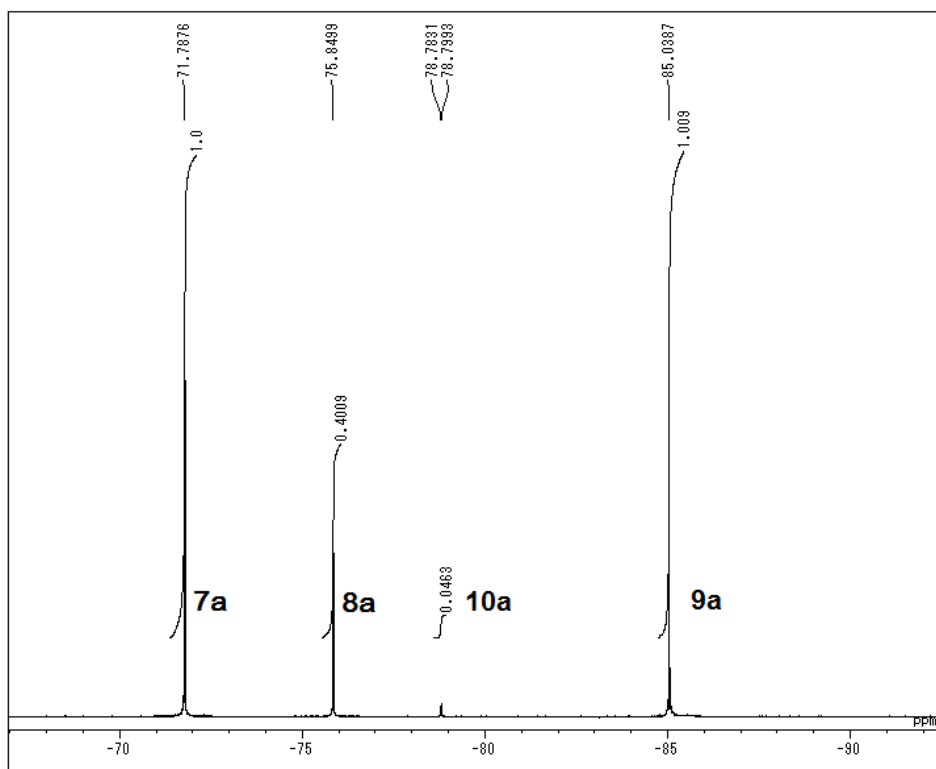

ファイル名 F:\NMR\JIANGXINDONG\2008.60  
6-666#636CTR-NAOHSOLID(DMF)-F.A  
LS  
初期ファイル名 F:\NMR\JiangXinDong\200  
8.606-666#636CTR-NAOHSolid(DMF)  
-F.als  
測定日時 05/Jan/2008 22:23:56  
注釈  
636CTR-NAOHSolid(DMF)-F  
観測核種 <sup>1</sup>H  
測定モード NON  
観測周波数(粗) 376.05 MHz  
観測周波数offset 133.3 kHz  
観測周波数Fine 23.0 Hz  
アーク点数 65536  
観測範囲 80000.0 Hz  
実積分回数 32  
FID取込時間 0.4096 s  
待ち時間 2.0 s  
パルス幅 5.8 μs  
decouple核種 <sup>1</sup>H  
プログラム -02  
装置 ALICE

entry 2

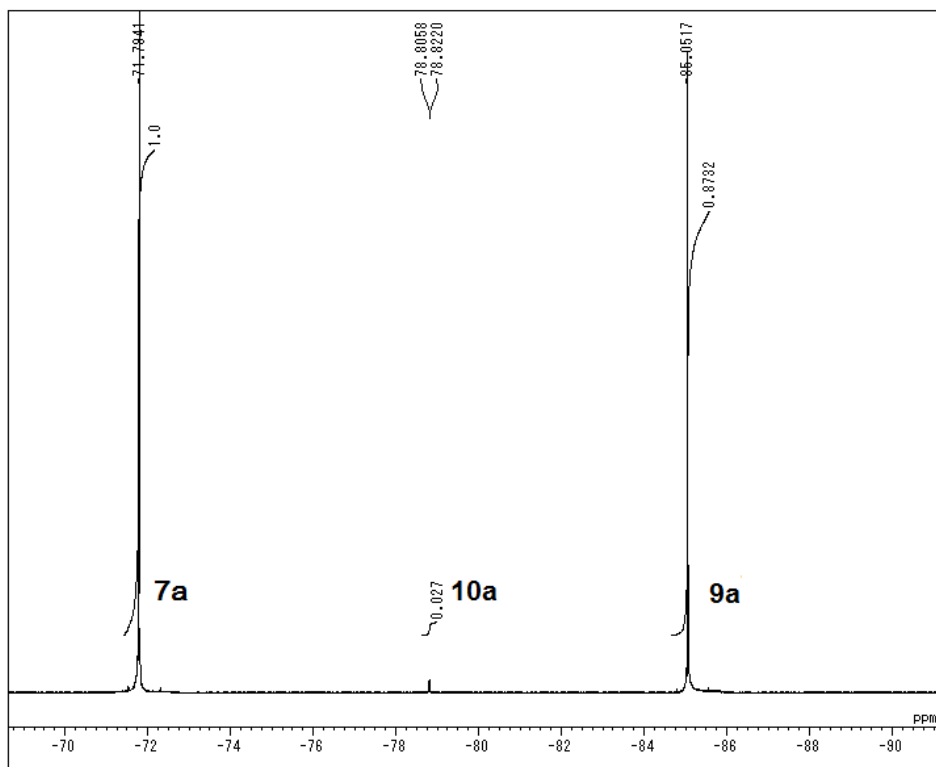

ファイル名 F:\NMR\JIANGXINDONG\2008.60  
6-666#633CTR-NAOH2O(THF)-F.ALS  
初期ファイル名 F:\NMR\JiangXinDong\200  
8.606-666#633CTR-NAOH2O(THF)-F  
.als  
測定日時 06/Jan/2008 11:14:24  
注釈  
633CTR-NAOH2O(THF)-F  
観測核種 <sup>1</sup>H  
測定モード NON  
観測周波数(粗) 376.05 MHz  
観測周波数offset 133.3 kHz  
観測周波数Fine 23.0 Hz  
アーク点数 65536  
観測範囲 80000.0 Hz  
実積分回数 32  
FID取込時間 0.4096 s  
待ち時間 2.0 s  
パルス幅 5.8 μs  
decouple核種 <sup>1</sup>H  
プログラム -02  
装置 ALICE  
パルスプログラム \*

entry 3

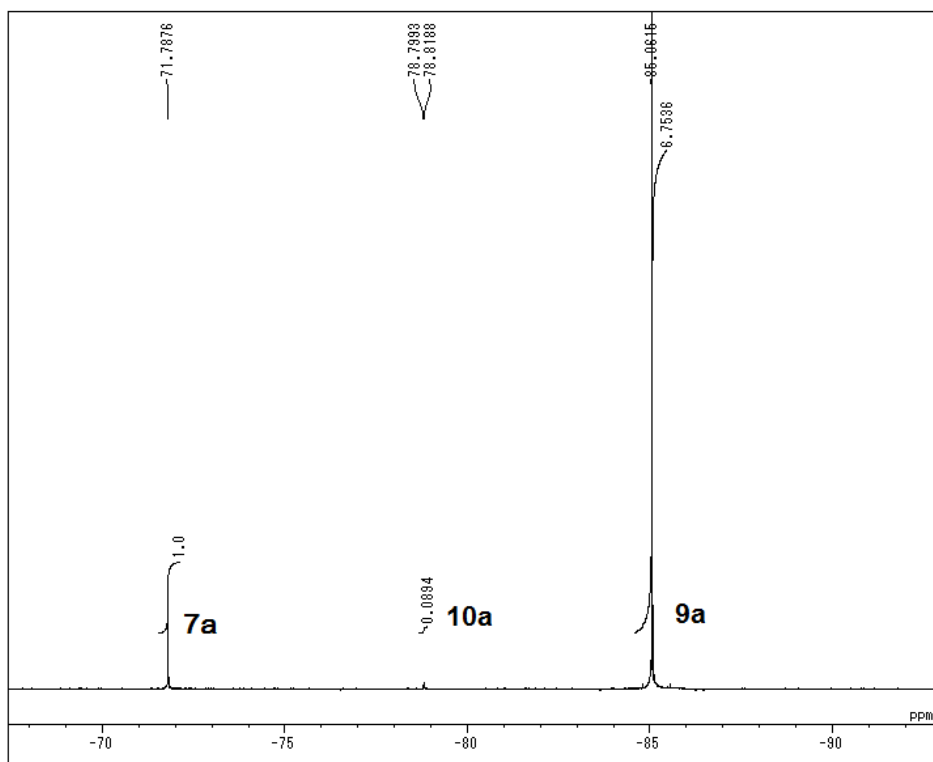

ファイル名 F:\NMR\JIANGXINDONG\2008.60  
6-666\634CTR-NAOHSOLID-F.ALS  
初期ファイル名 F:\NMR\JiangXinDong\200  
8.606-666\634CTR-NAOHSolid-F.a

測定日時 05/Jan/2008 13:08:55

注釈

634CTR-NAOHSolid-F  
観測核種 <sup>1</sup>H  
測定モード NON  
観測周波数(粗) 376.05 MHz  
観測周波数offset 133.9 kHz  
観測周波数Fine 23.0 Hz  
データ点数 65536  
観測範囲 80000.0 Hz  
実積回回数 32  
FID取り時間 0.4096 s  
待ち時間 2.0 s  
パルス幅 5.8 μs  
decouple核種 <sup>1</sup>H  
プログラム -02  
装置 ALICE  
パルスプログラム \*

entry 4

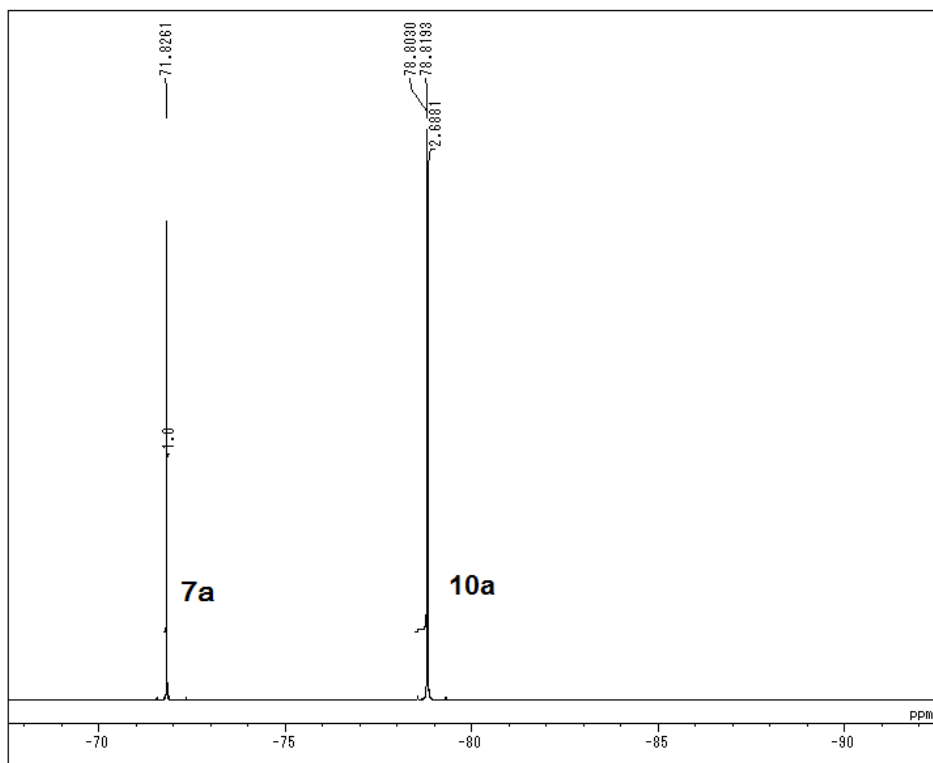

ファイル名 F:\NMR\JIANGXINDONG\2008.33  
7-353CANNIZZARO-TYPE REACTION\3  
38CTR(CF3)(NaBH4)0920-F.ALS

初期ファイル名 F:\NMR\JiangXinDong\200  
6.337-353Cannizzaro-type Reacti  
on\338CTR(CF3)(NaBH4)0920-f.als

測定日時 20/Sep/2006 13:04:43

注釈

338f  
観測核種 <sup>1</sup>H  
測定モード NON  
観測周波数(粗) 372.35 MHz  
観測周波数offset 115.0 kHz  
観測周波数Fine 10671.0 Hz  
データ点数 65536  
観測範囲 80000.0 Hz  
実積回回数 32  
FID取り時間 0.4096 s  
待ち時間 2.0 s  
パルス幅 5.8 μs  
decouple核種 <sup>1</sup>H  
プログラム -02  
装置 ALICE

Figure S3. Synthesis of **10a** by the reaction of **7a** with NaBH<sub>4</sub>.

Figure S4. Entry 1-6 in Table 2.

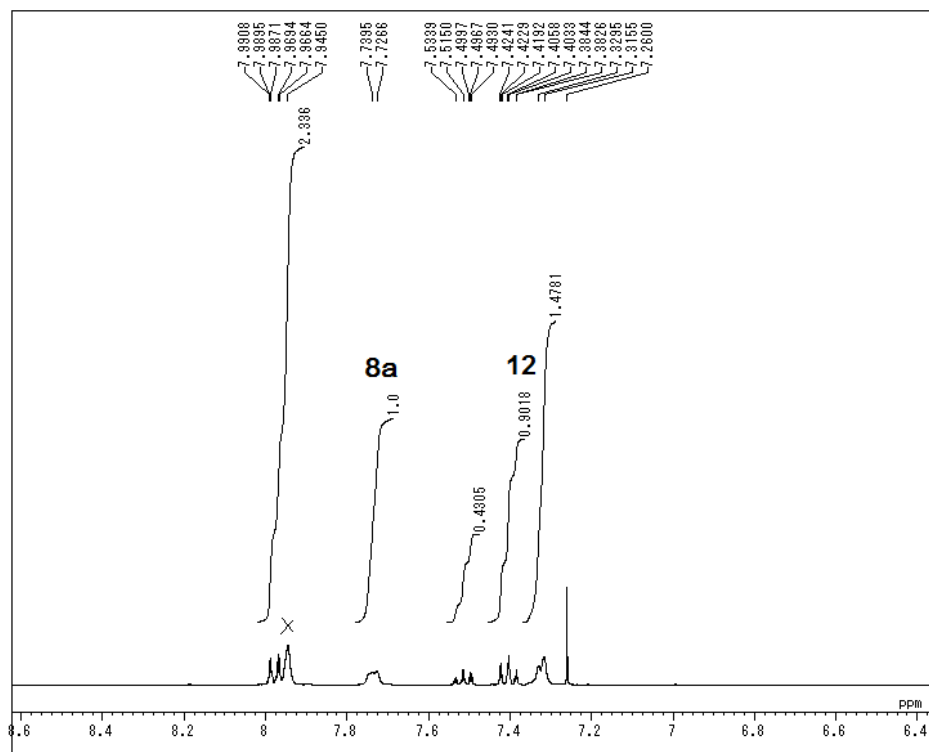

ファイル名 F:\NMR\JIANGXINDONG\2006.33  
7-353CANNIZZARO-TYPE REACTION\#3  
40CTR(CF3)(DMF-BUOK)0921-H(CDCL  
3).ALS  
初期ファイル名 F:\NMR\JiangXinDong\200  
6.337-353Cannizzaro-type Reacti  
on\#340CTR(CF3)(DMF-BuOK)0921-h(  
CDCl3).als  
測定日時 21/Sep/2006 13:42:17  
注釈  
観測核種 <sup>1</sup>H  
測定モード NON  
観測周波数(粗) 395.75 MHz  
観測周波数offset 124.0 kHz  
観測周波数Fine 10277.0 Hz  
ピーク点数 32768  
観測範囲 7912.958 Hz  
実積算回数 8  
FID取得時間 4.1411 s  
待ち時間 2.859 s  
1Hパルス幅 6.8 μs  
decouple核種 <sup>1</sup>H

entry 1

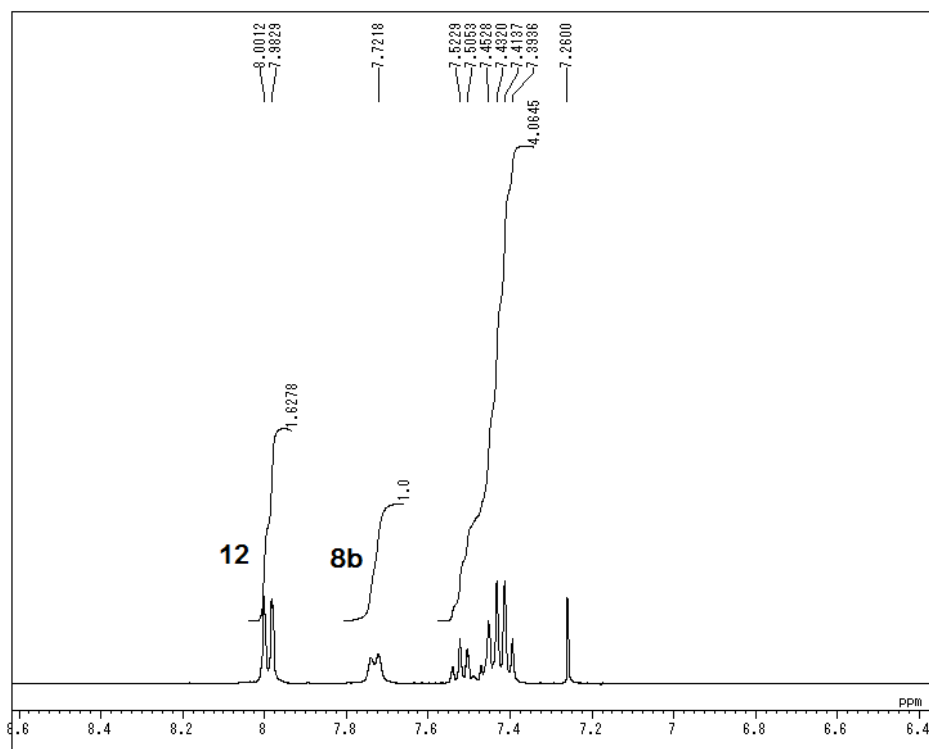

ファイル名 F:\NMR\JIANGXINDONG\2006.33  
7-353CANNIZZARO-TYPE REACTION\#3  
49C2F5-(tBuOK-DMF)0927-(CDCL3)H  
.ALS  
初期ファイル名 F:\NMR\JiangXinDong\200  
6.337-353Cannizzaro-type Reacti  
on\#349C2F5-(tBuOK-DMF)0927-(CD  
Cl3)h.als  
測定日時 27/Sep/2006 13:28:05  
注釈  
観測核種 <sup>1</sup>H  
測定モード NON  
観測周波数(粗) 399.65 MHz  
観測周波数offset 124.0 kHz  
観測周波数Fine 10500.0 Hz  
ピーク点数 32768  
観測範囲 7992.008 Hz  
実積算回数 8  
FID取得時間 4.1001 s  
待ち時間 2.9 s  
1Hパルス幅 5.8 μs  
decouple核種 <sup>1</sup>H

entry 2

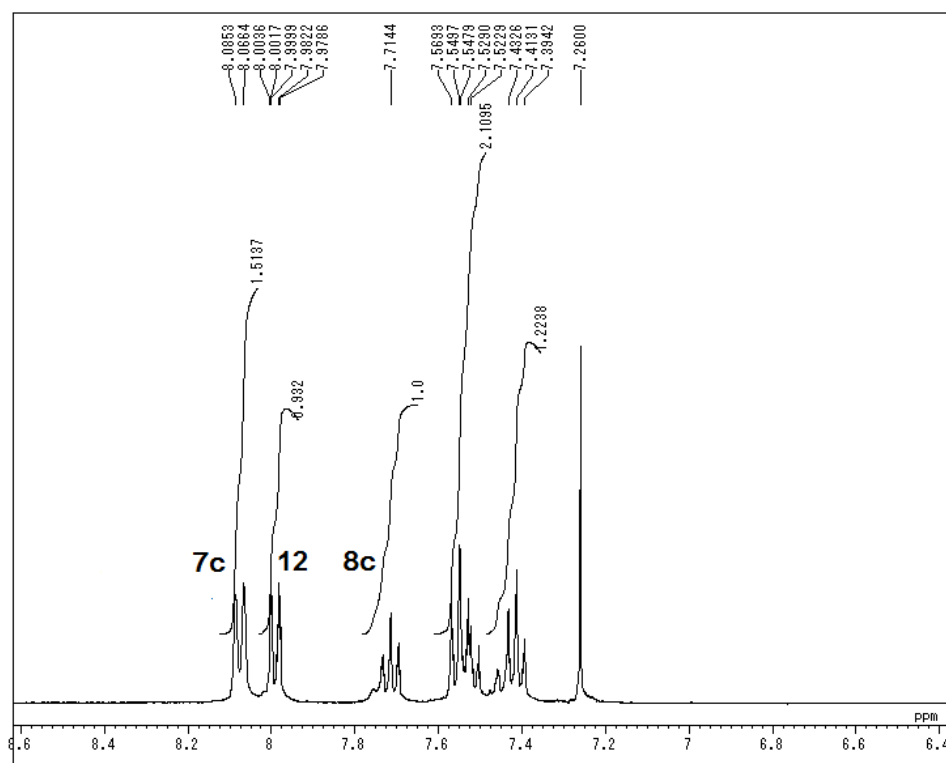

ファイル名 F:\NMR\JIANGXINDONG\2006.33  
7-353CANNIZZARO-TYPE REACTION\3  
53C3F7-(tBuOK-DMF)0929-(H<sub>2</sub>O).H.A  
LS  
初期ファイル名 F:\NMR\JiangXinDong\200  
6.337-353Cannizzaro-type Reacti  
on\353C3F7-(tBuOK-DMF)0929-(H<sub>2</sub>  
O).h.als  
測定日時 29/Sep/2006 14:33:16  
注釈  
観測核種 <sup>1</sup>H  
測定モード NON  
観測周波数(粗) 395.75 MHz  
観測周波数offset 124.0 kHz  
観測周波数Fine 10277.0 Hz  
スケール数 32768  
観測範囲 7912.958 Hz  
実積回数 8  
FID取込時間 4.1411 s  
待ち時間 2.859 s  
パルス幅 6.8 μs  
decouple核種 <sup>1</sup>H

entry 3

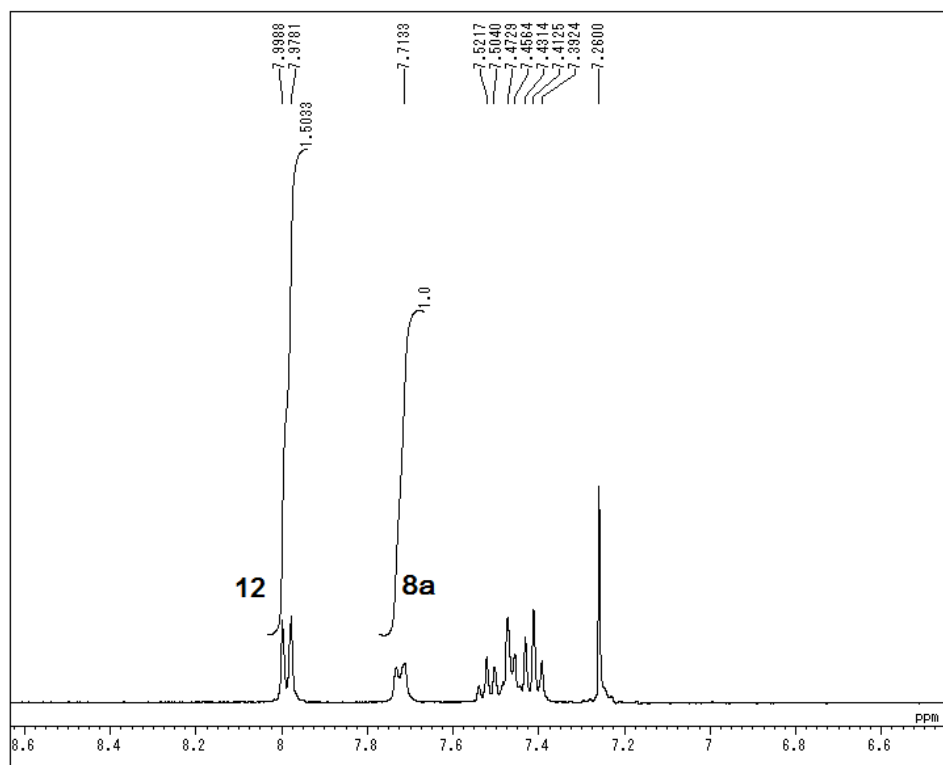

ファイル名 F:\NMR\JIANGXINDONG\2006.33  
7-353CANNIZZARO-TYPE REACTION\3  
54MARTINILIGAND-1003-H.ALS  
初期ファイル名 F:\NMR\JiangXinDong\200  
6.337-353Cannizzaro-type Reacti  
on\354Martini ligand-1003-h.als  
測定日時 03/Oct/2006 11:28:54  
注釈  
観測核種 <sup>1</sup>H  
測定モード NON  
観測周波数(粗) 399.65 MHz  
観測周波数offset 124.0 kHz  
観測周波数Fine 10500.0 Hz  
スケール数 32768  
観測範囲 7982.008 Hz  
実積回数 8  
FID取込時間 4.1001 s  
待ち時間 2.9 s  
パルス幅 5.8 μs  
decouple核種 <sup>1</sup>H  
プロブ -02  
装置 ALICE

entry 4

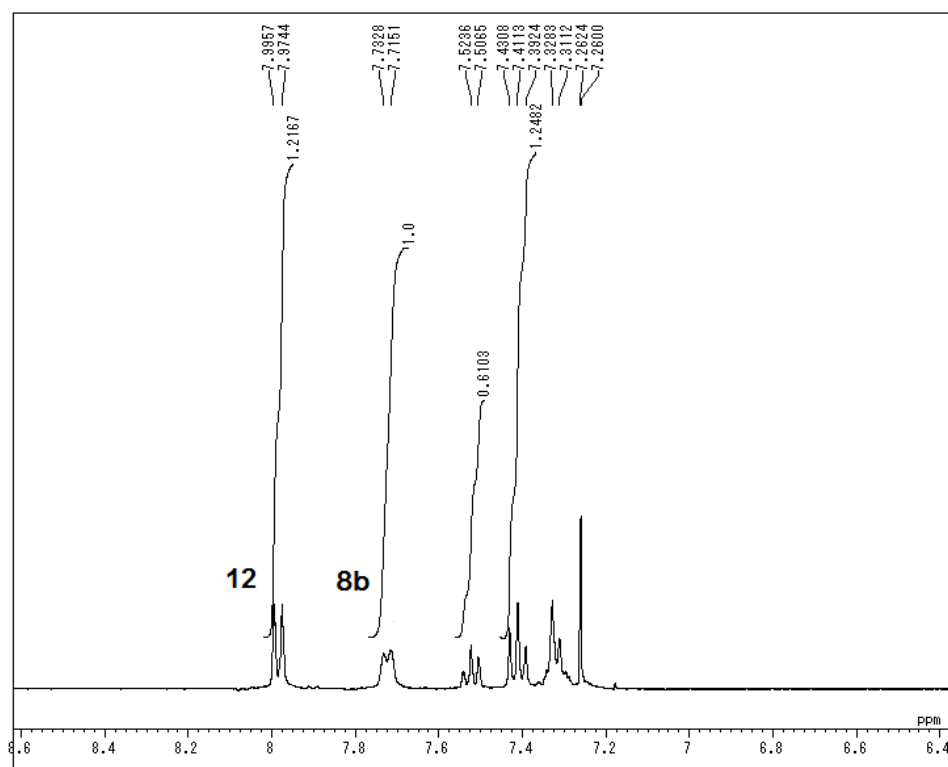

ファイル名 F:\NMR\JIANGXINDONG\2006.33  
7-353CANNIZZARO-TYPE REACTION\#3  
48C2F5-(tBuOK-THF)0927-(CDCl3)H  
.ALS  
初期ファイル名 F:\NMR\JiangXinDong\200  
6.337-353Cannizzaro-type Reacti  
on\#348C2F5-(tBuOK-THF)0927-(CD  
Cl3)h.als  
測定日時 27/Sep/2006 12:50:07  
注釈  
348h  
観測核種 <sup>1</sup>H  
測定モード NON  
観測周波数(粗) 399.65 MHz  
観測周波数Offset 124.0 kHz  
観測周波数Fine 10500.0 Hz  
データ点数 32768  
観測範囲 7992.008 Hz  
実検出回数 8  
FID取得時間 4.1001 s  
待ち時間 2.9 s  
1Hパルス幅 5.8 μs  
decouple核種 <sup>1</sup>H

entry 5

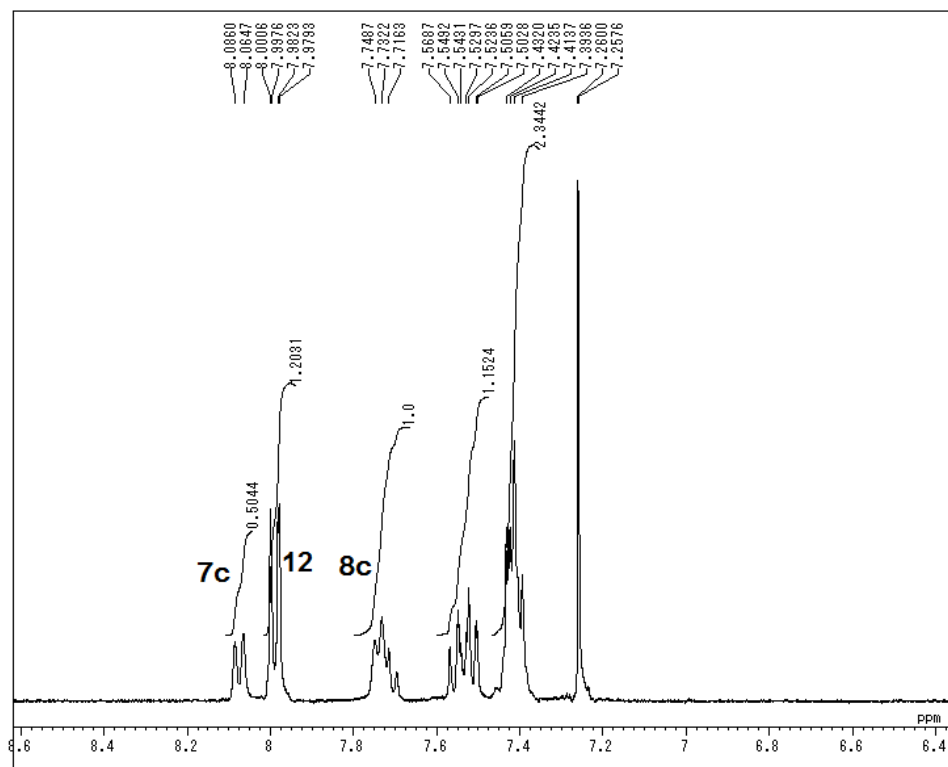

ファイル名 F:\NMR\JIANGXINDONG\2006.33  
7-353CANNIZZARO-TYPE REACTION\#3  
52C3F7-(tBuOK-THF)0929-(CDCl3)H  
.ALS  
初期ファイル名 F:\NMR\JiangXinDong\200  
6.337-353Cannizzaro-type Reacti  
on\#352C3F7-(tBuOK-THF)0929-(CD  
Cl3)h.als  
測定日時 29/Sep/2006 13:22:40  
注釈  
352C3F7-THF-h  
観測核種 <sup>1</sup>H  
測定モード NON  
観測周波数(粗) 399.65 MHz  
観測周波数Offset 124.0 kHz  
観測周波数Fine 10500.0 Hz  
データ点数 32768  
観測範囲 7992.008 Hz  
実検出回数 8  
FID取得時間 4.1001 s  
待ち時間 2.9 s  
1Hパルス幅 5.8 μs  
decouple核種 <sup>1</sup>H

entry 6

Copies of  $^1\text{H}$ ,  $^{19}\text{F}$  and  $^{31}\text{P}$  NMR spectra

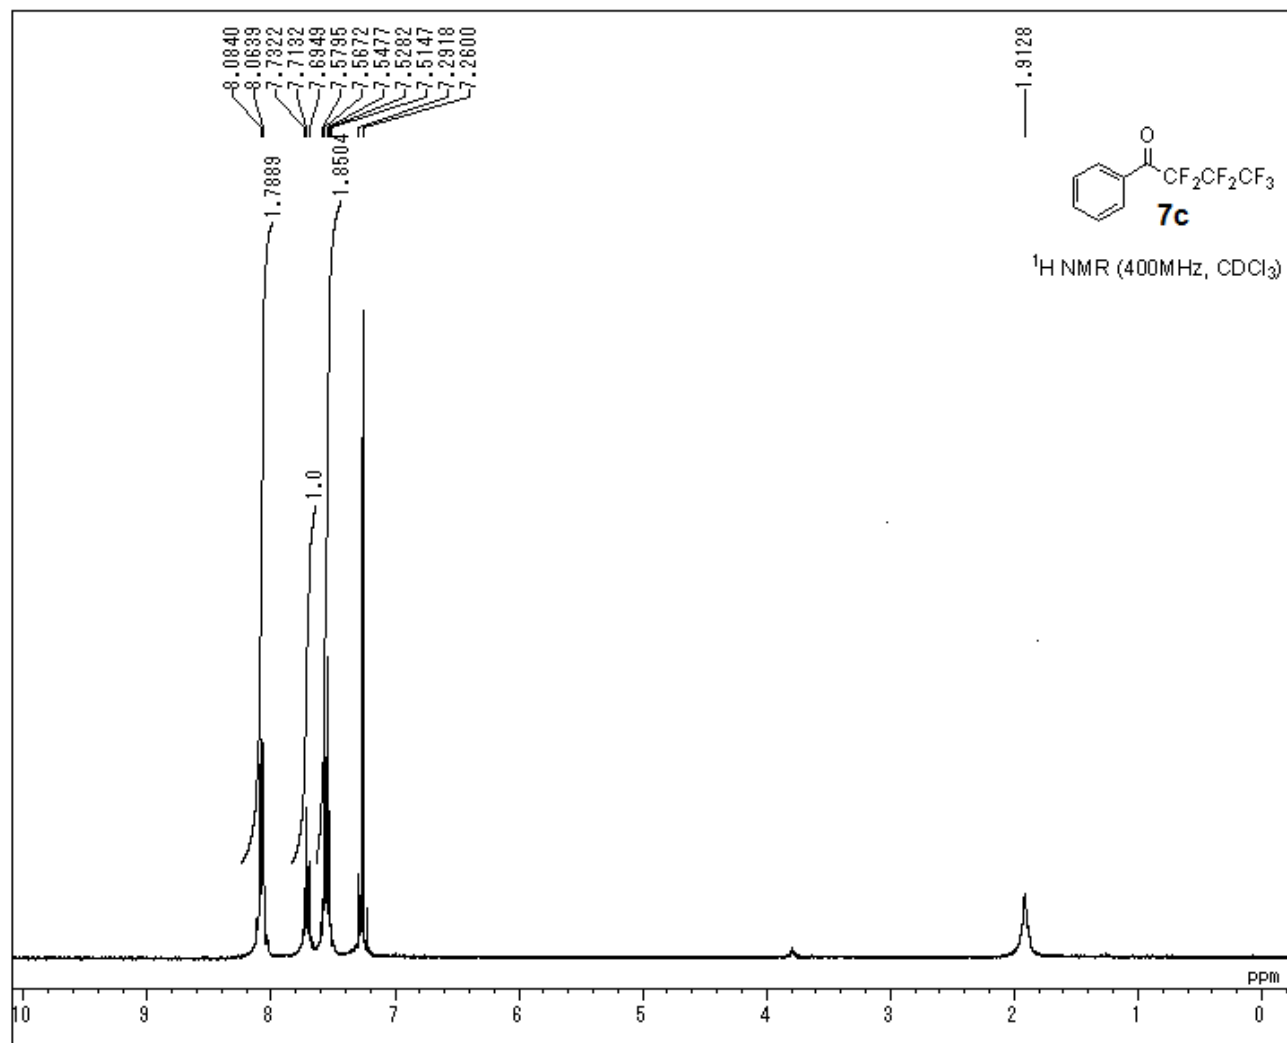



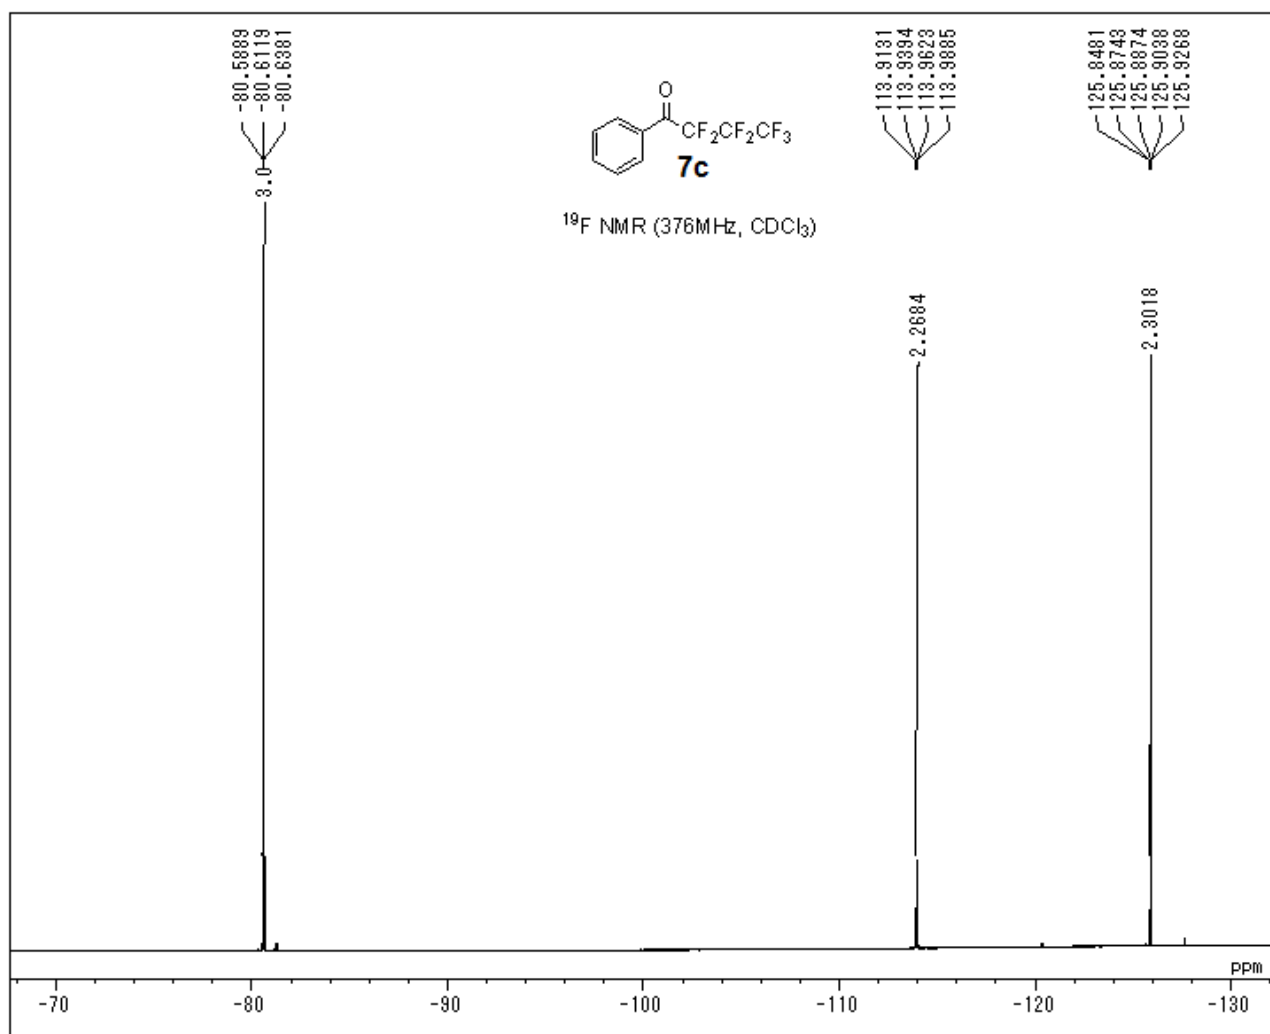

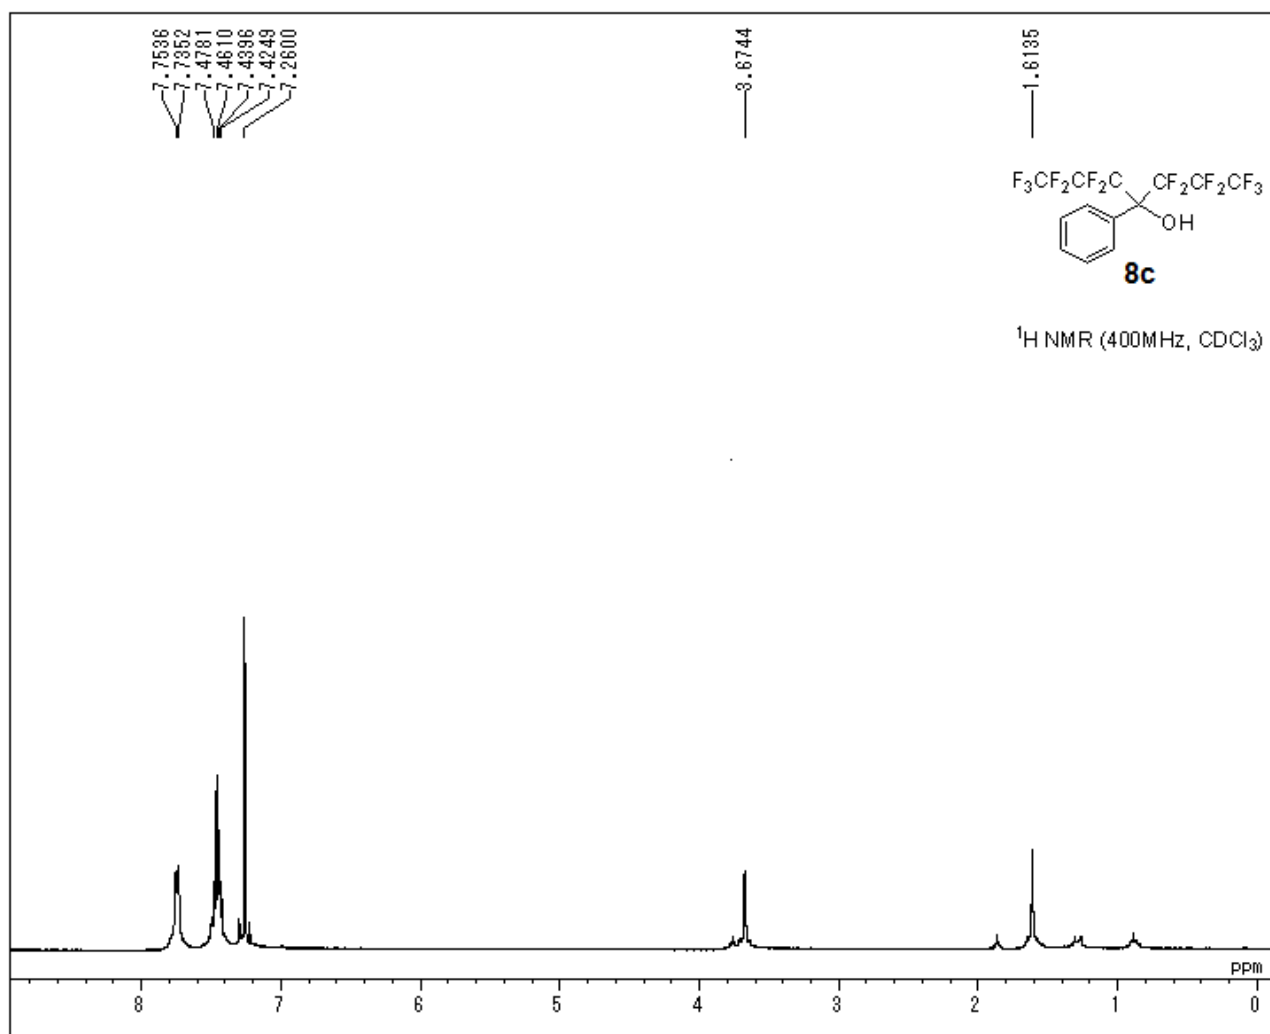

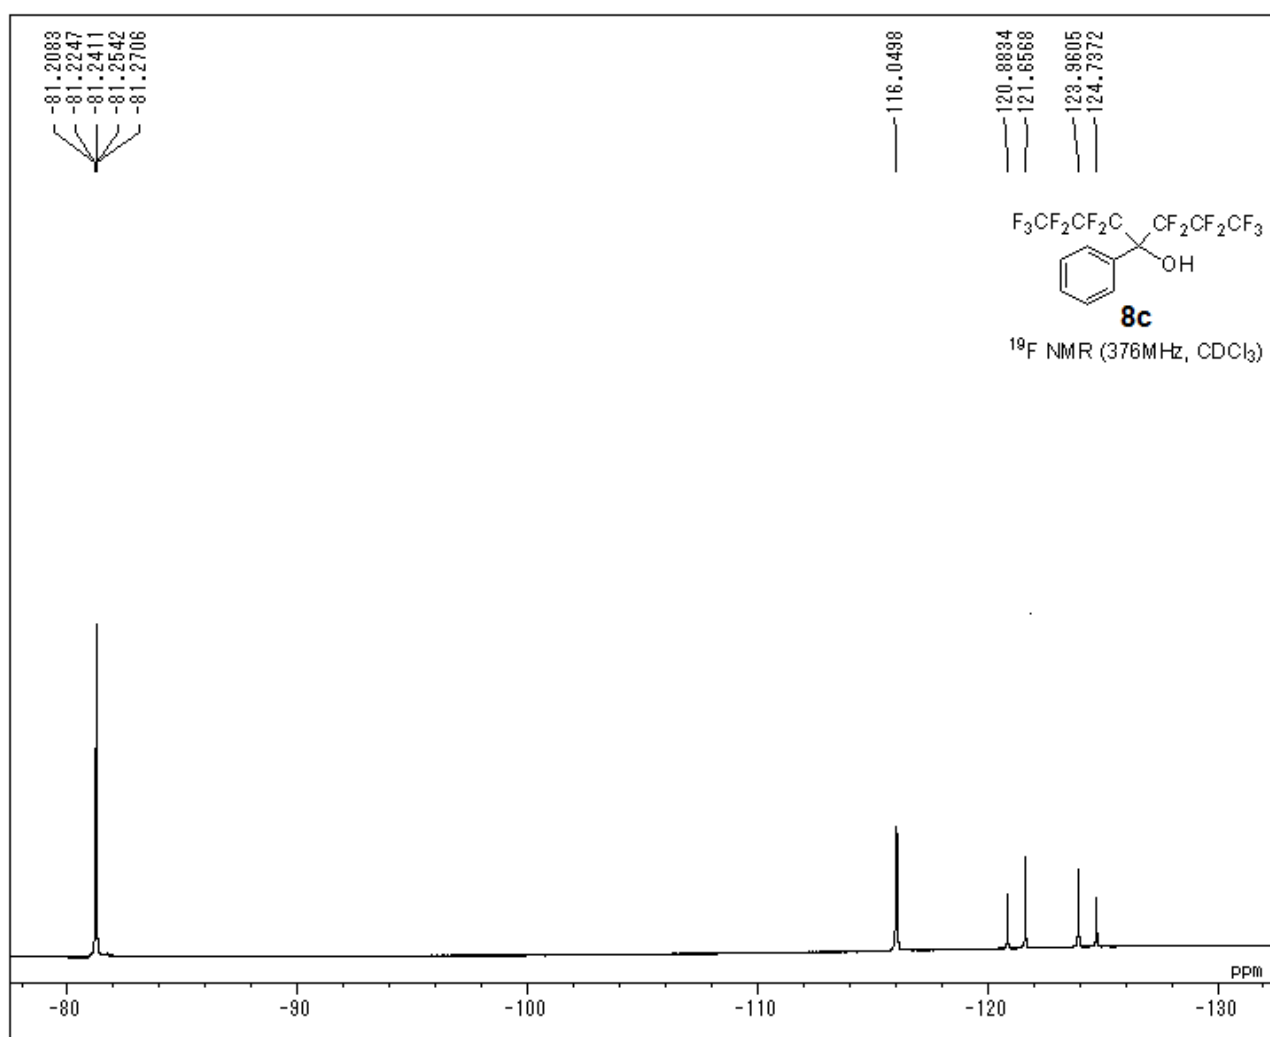

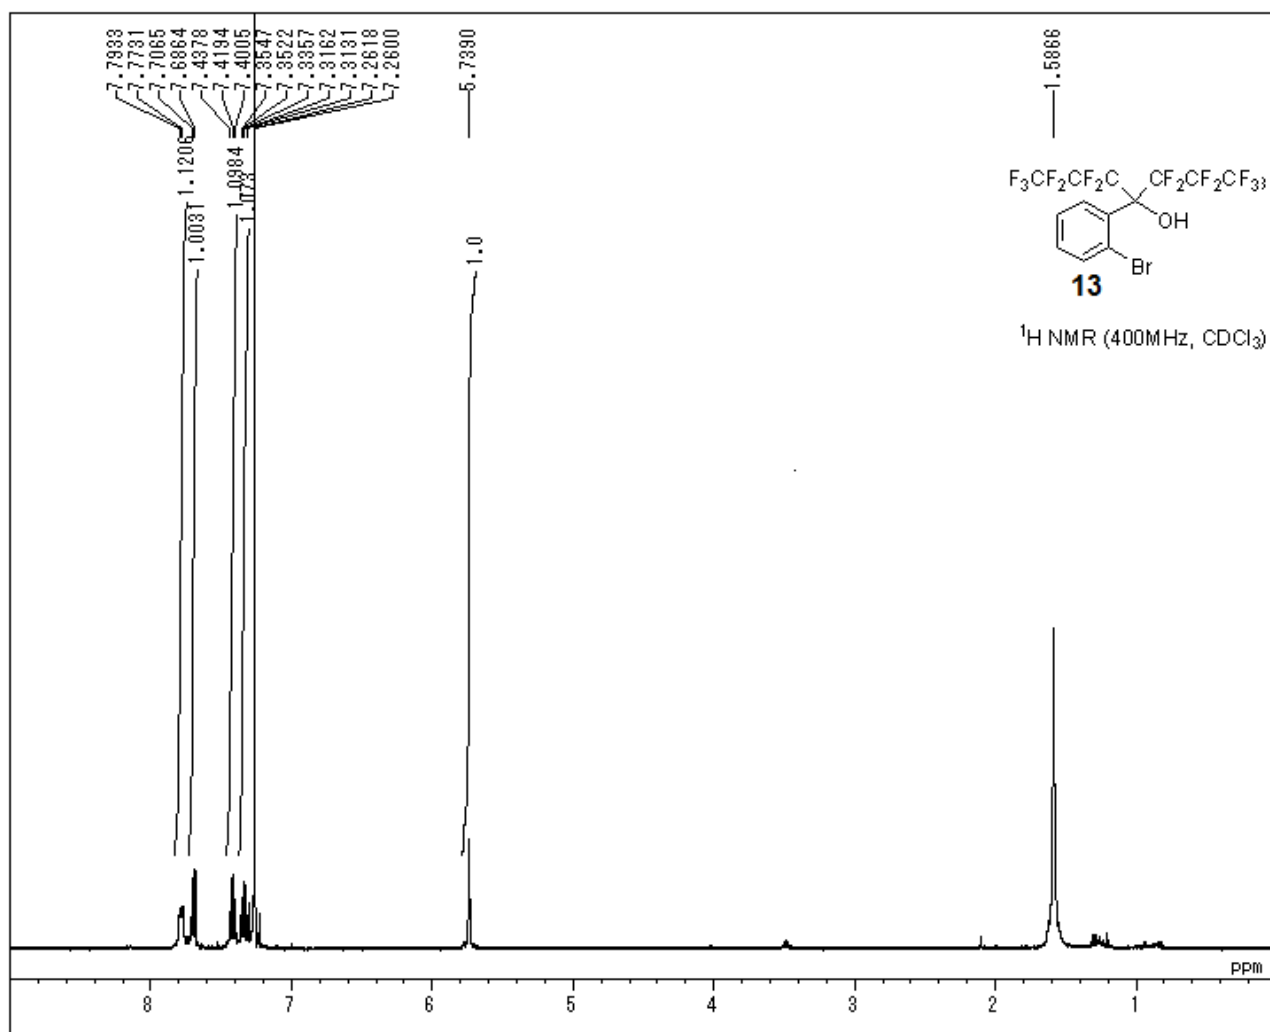

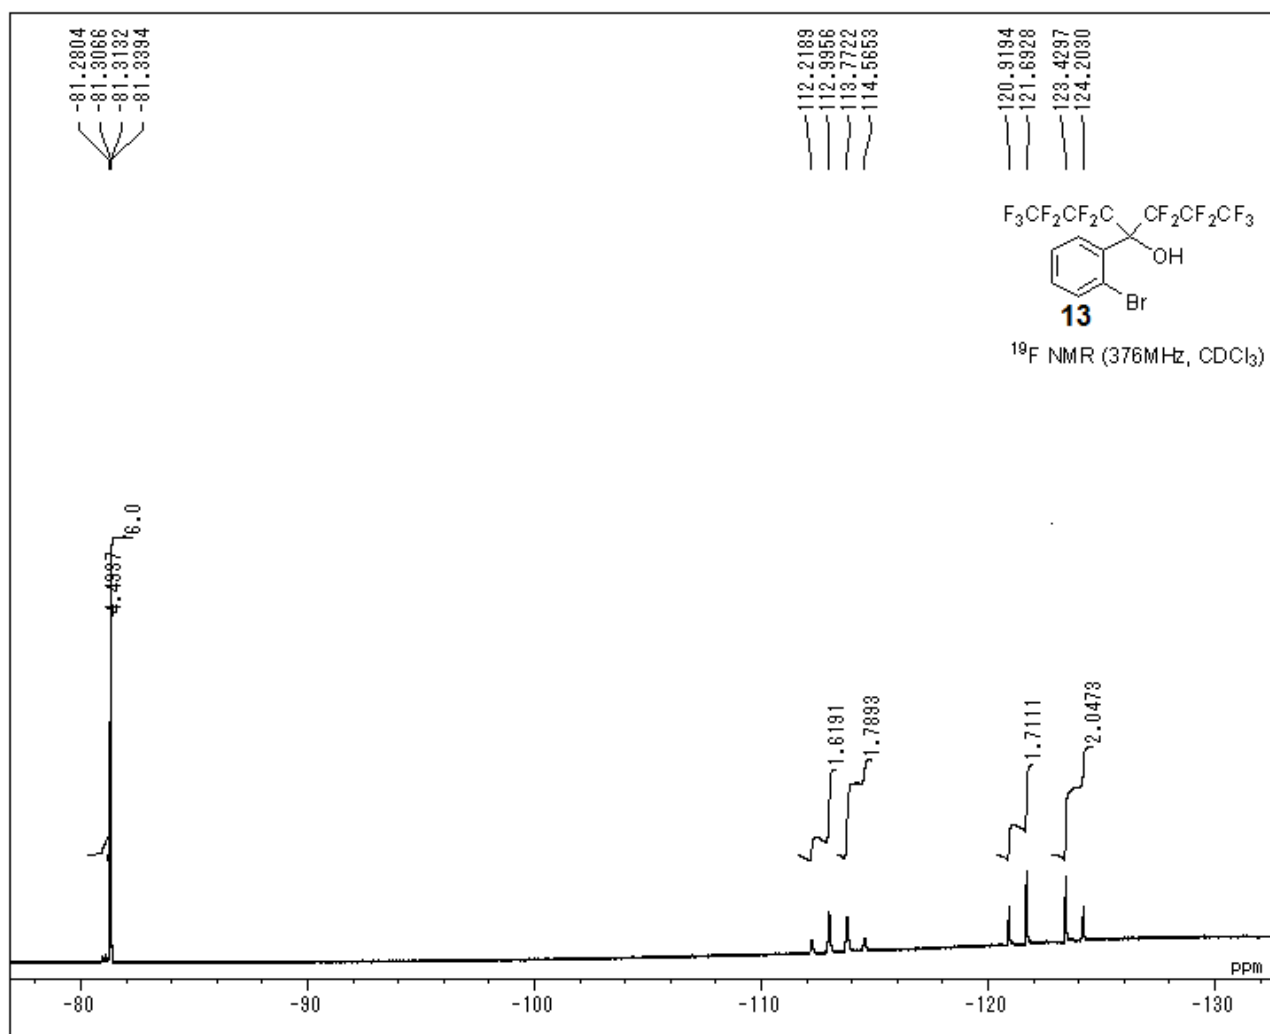

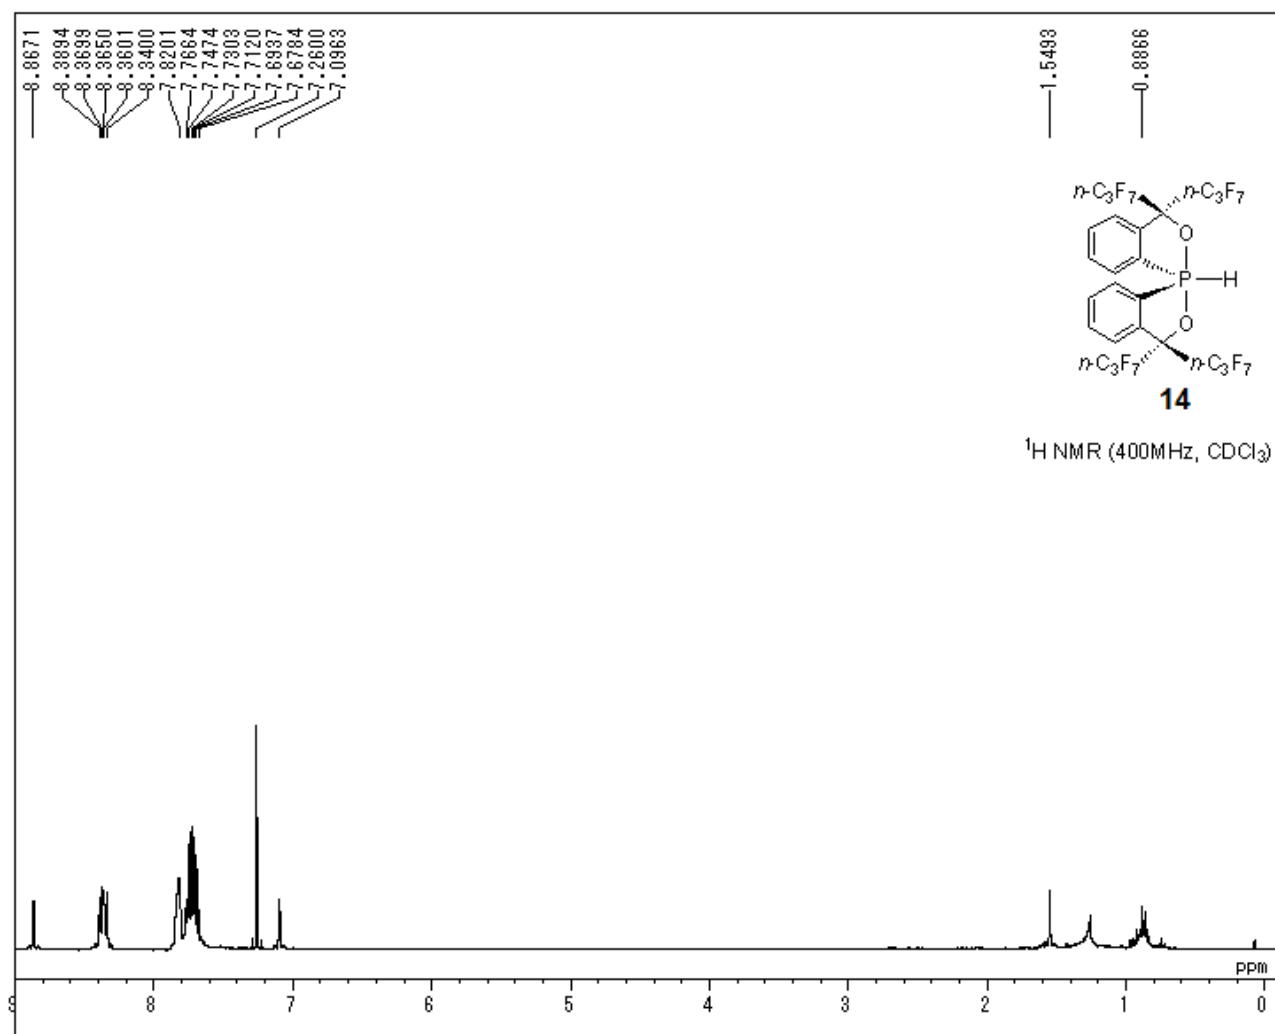

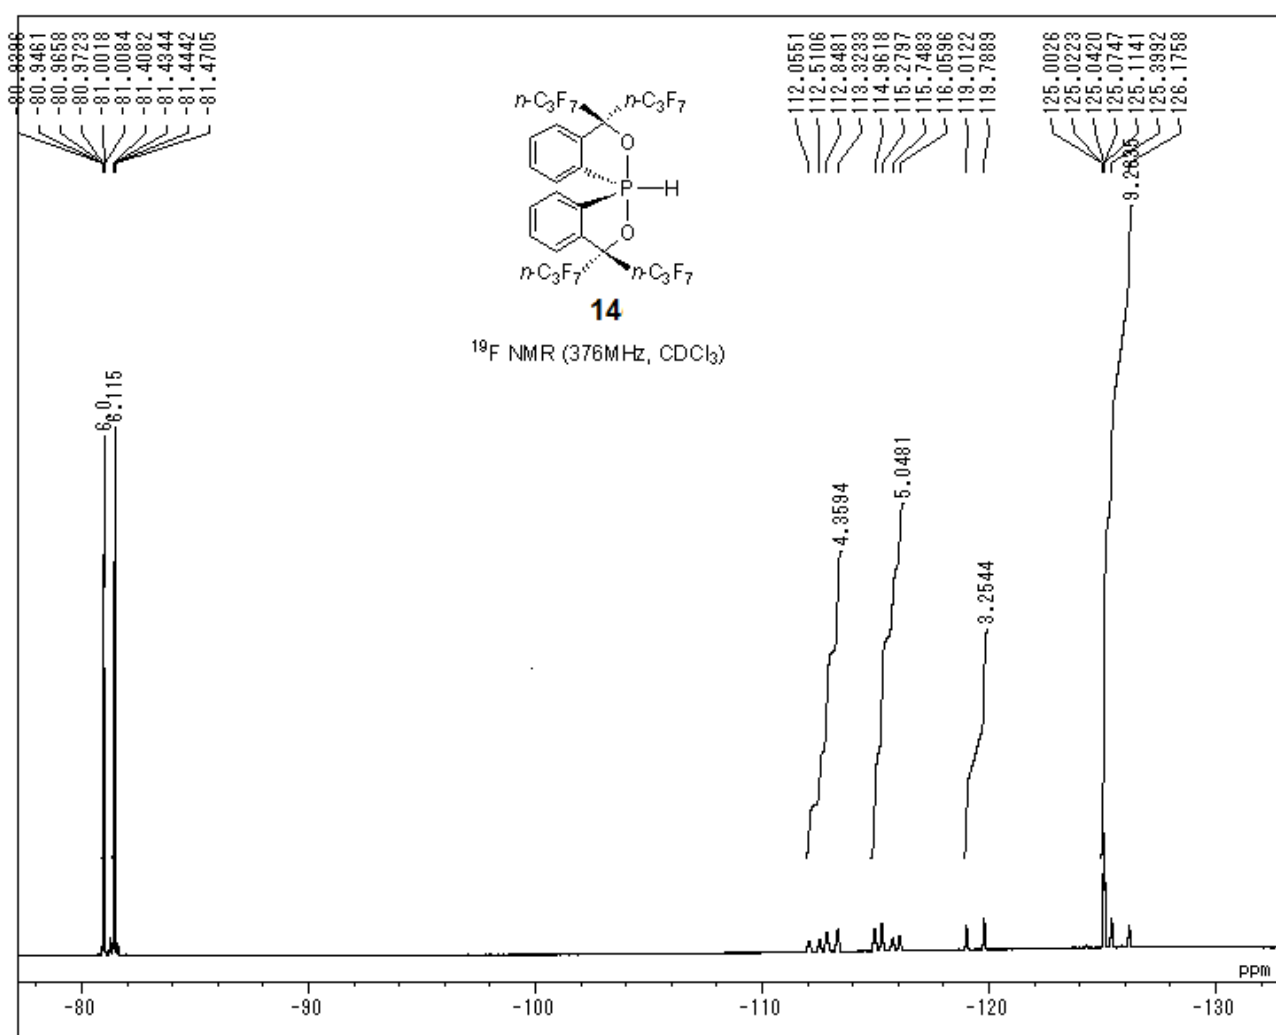

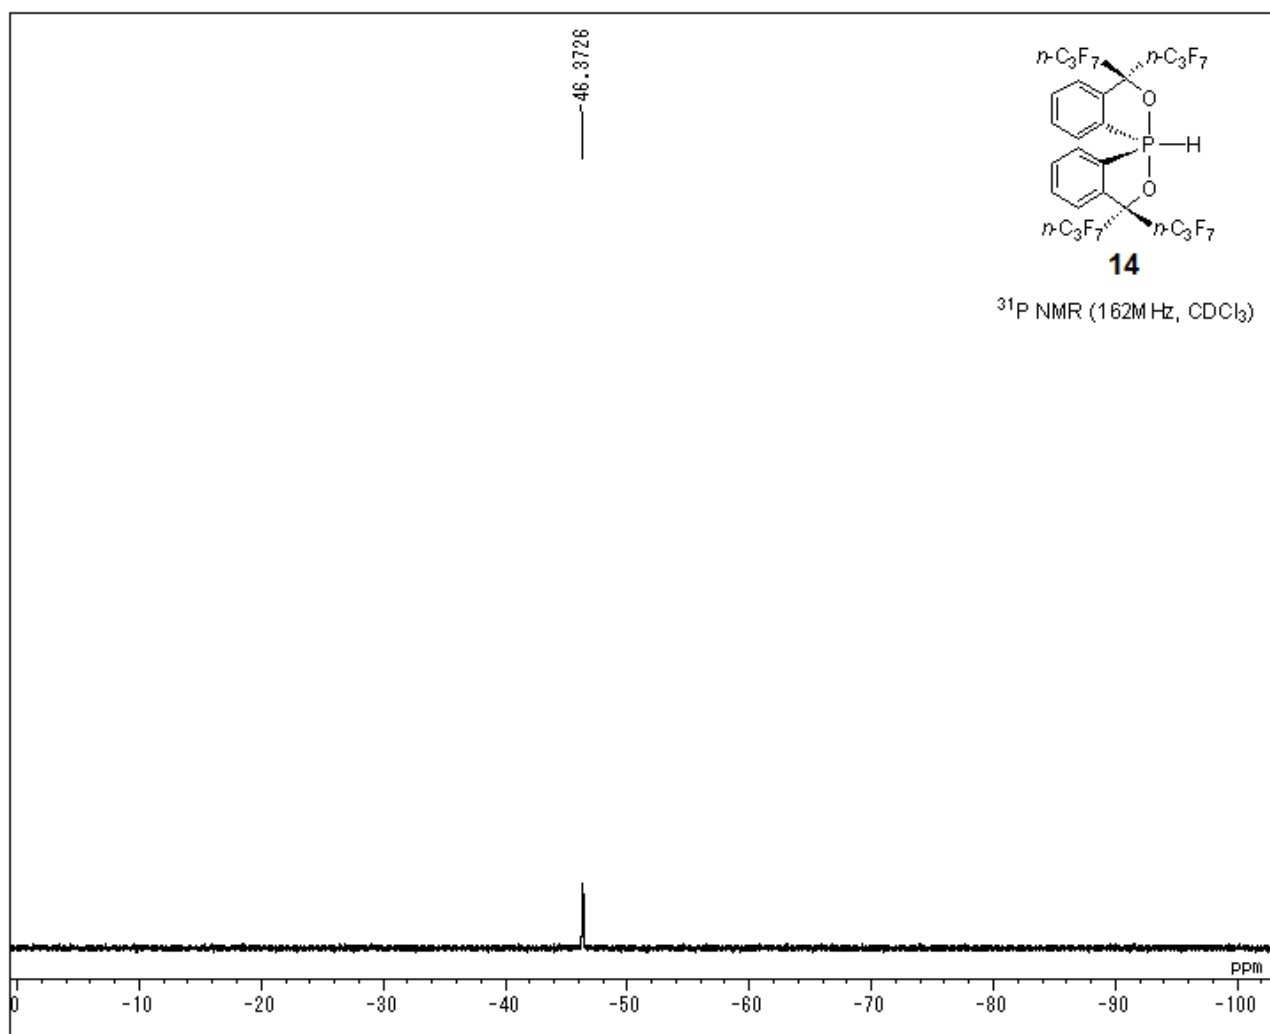



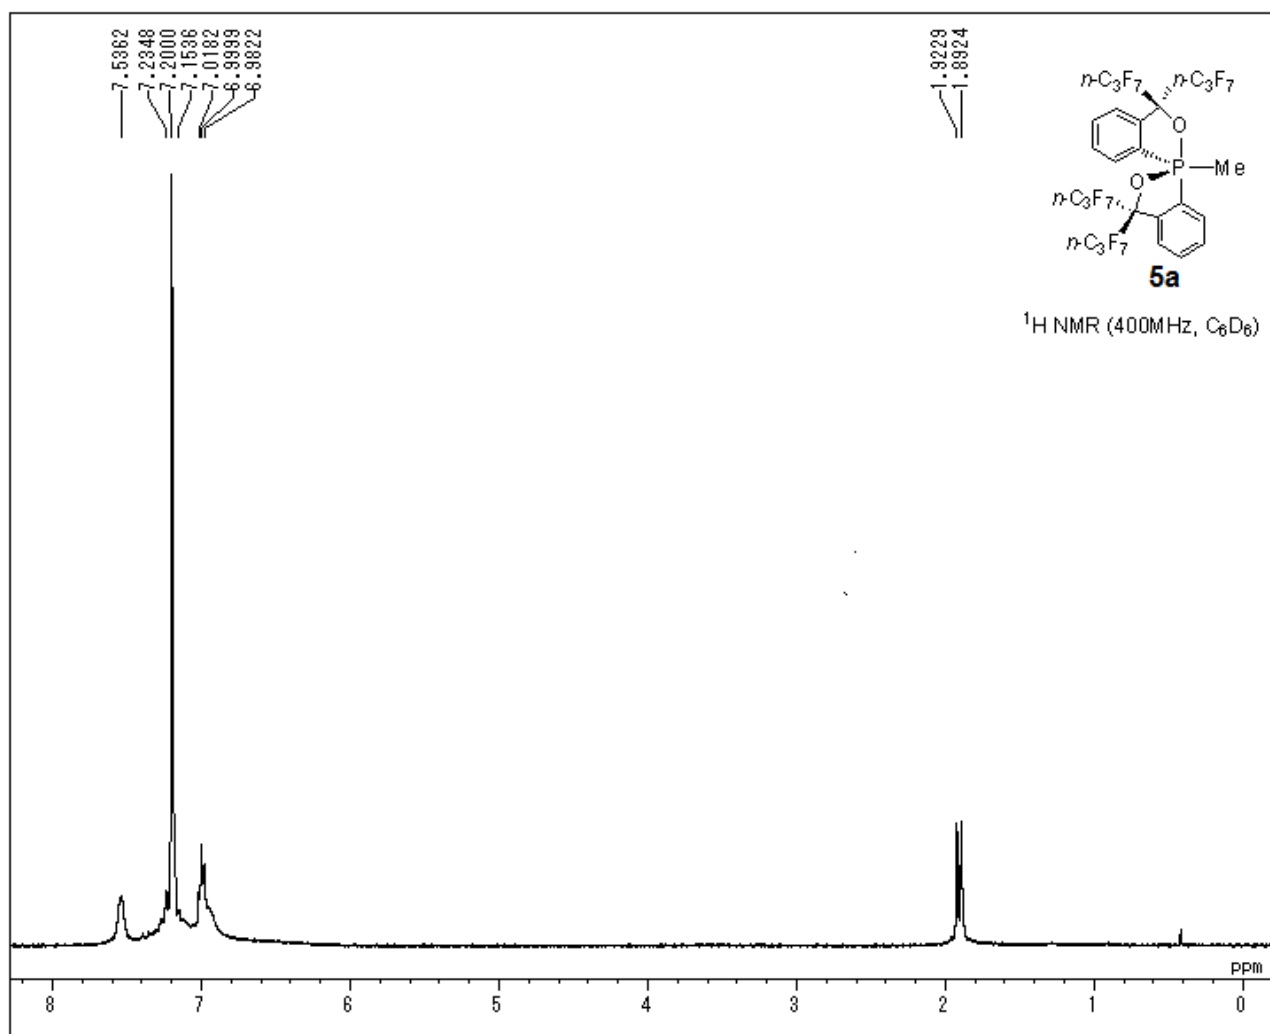

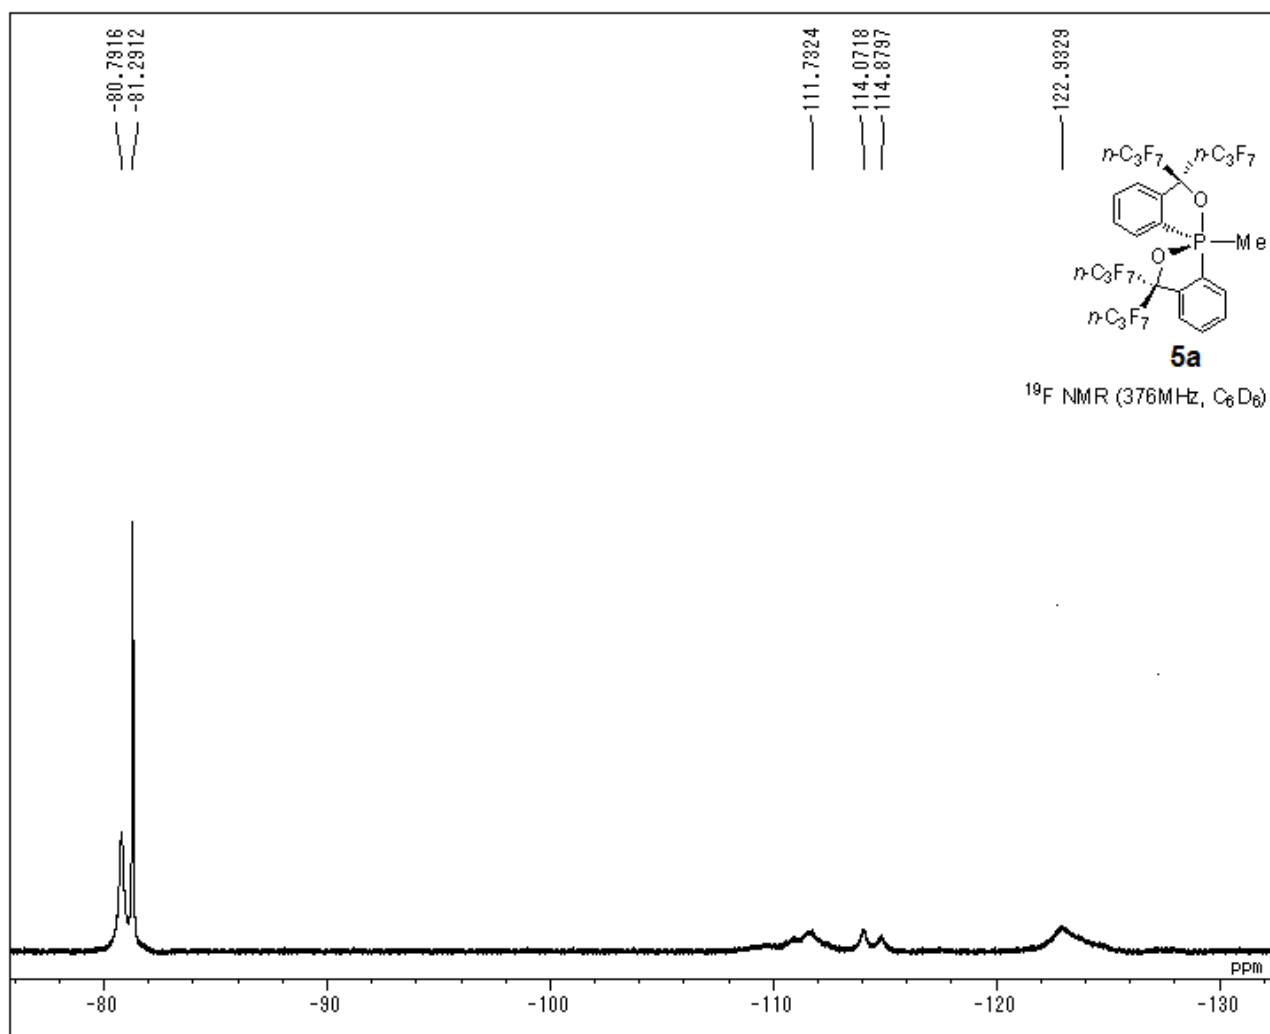

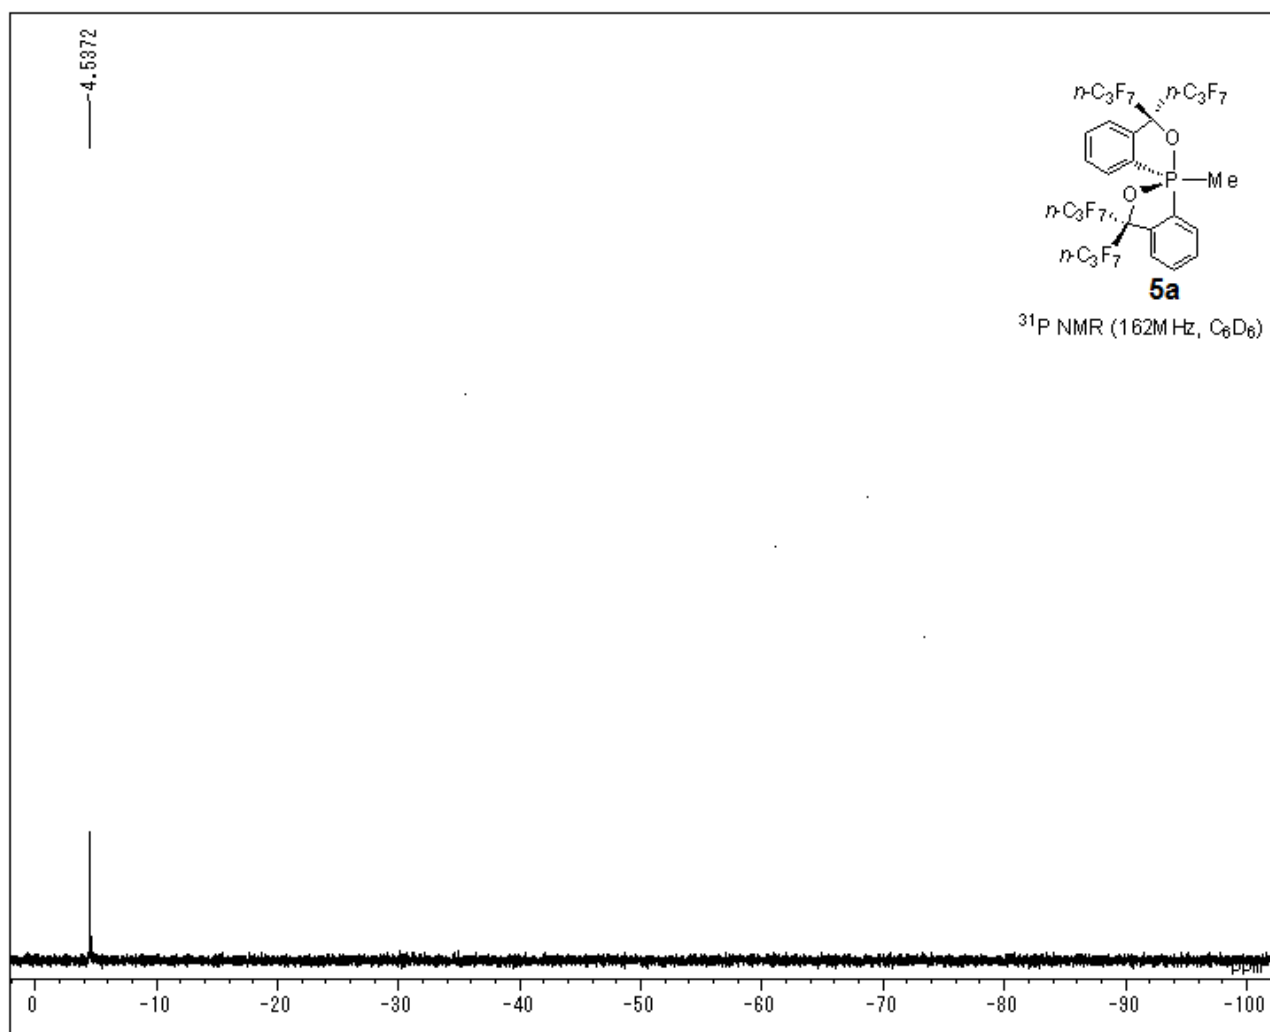

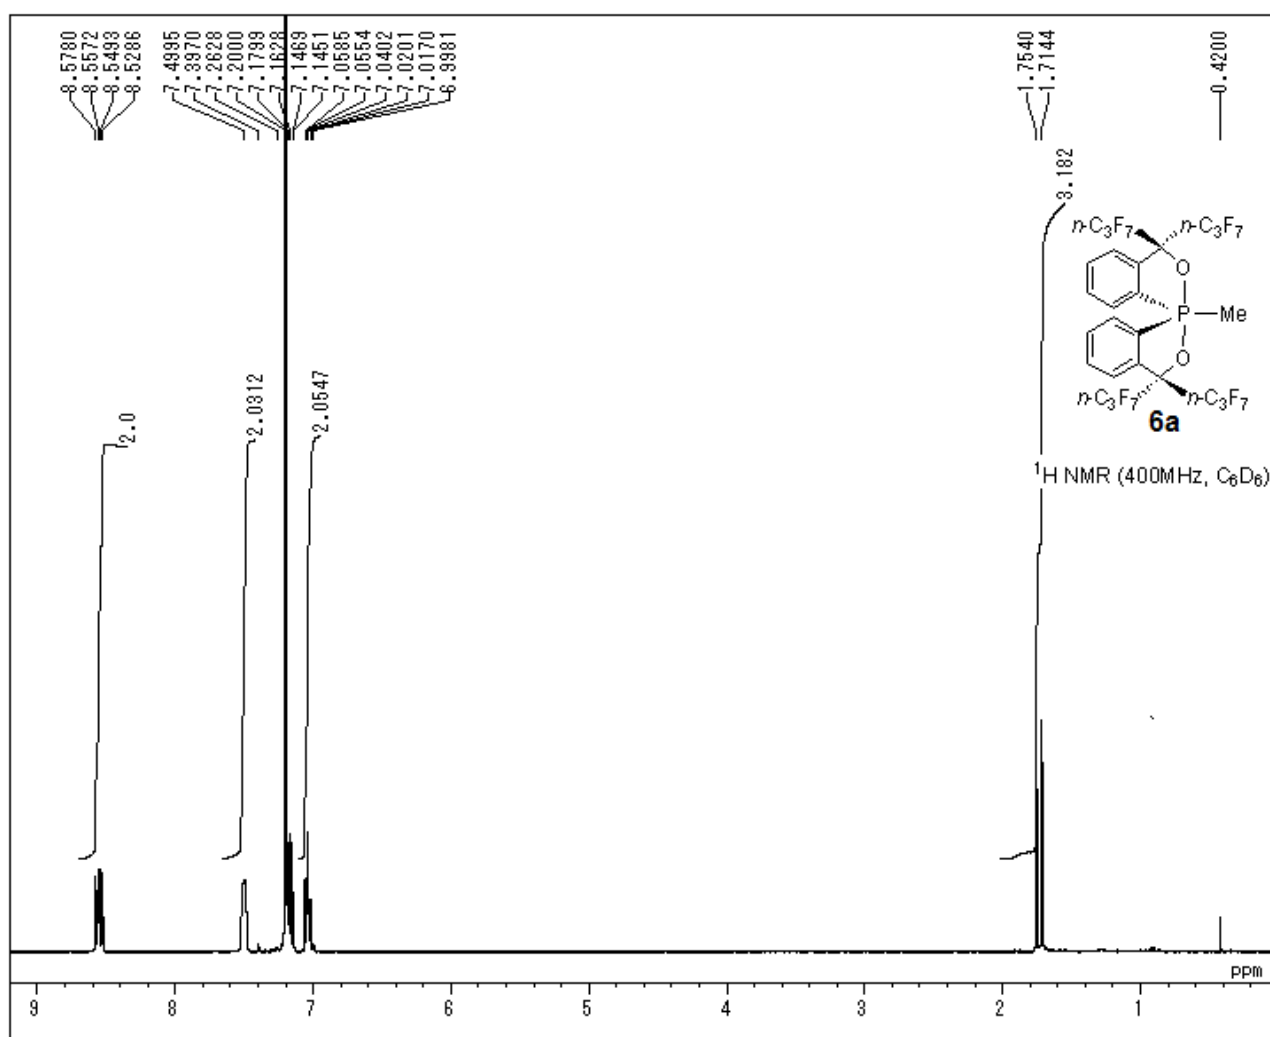

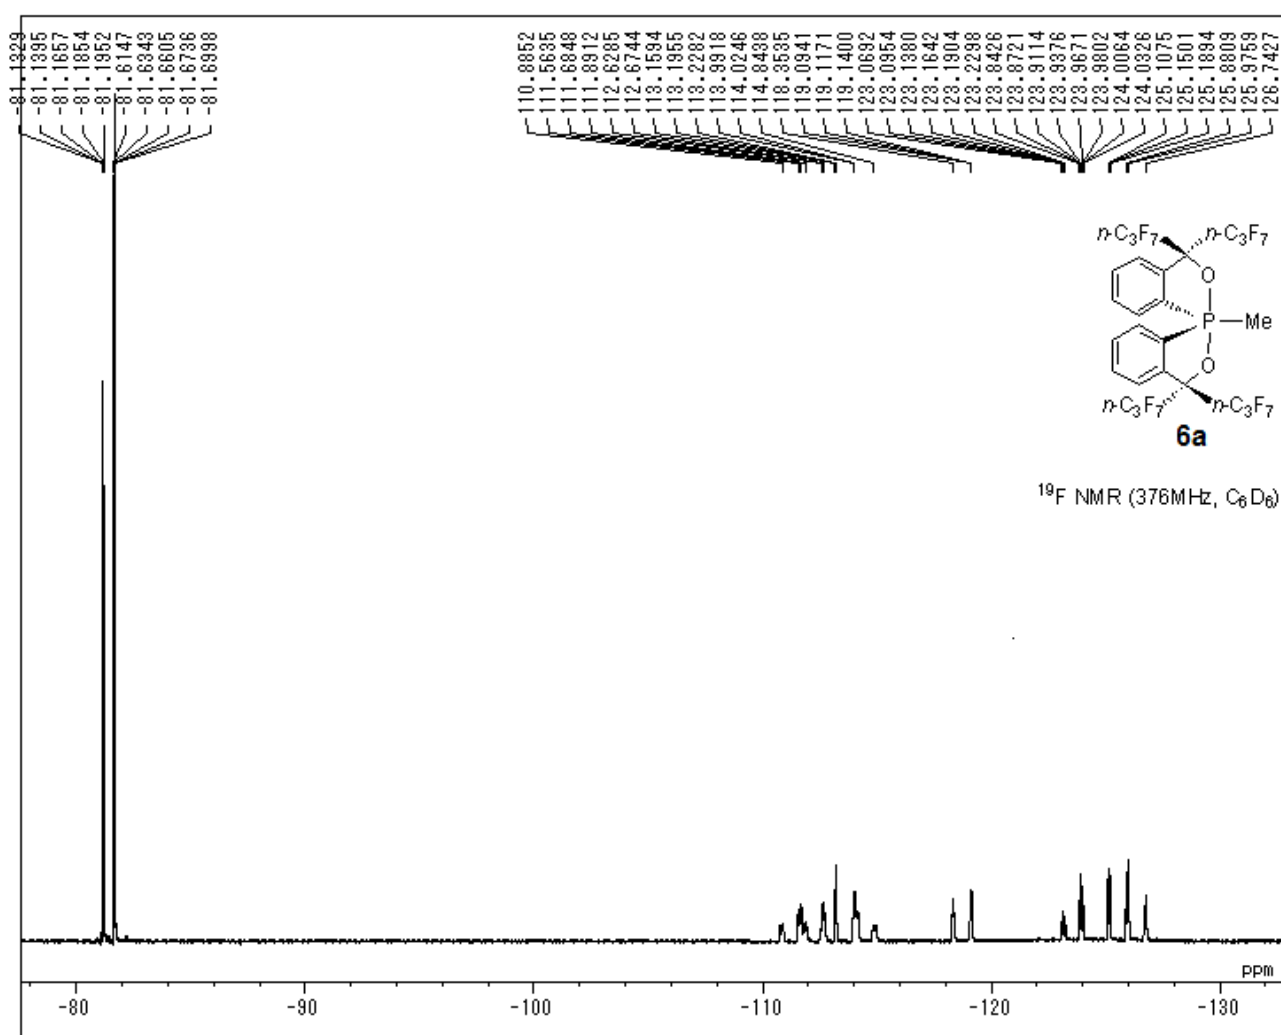

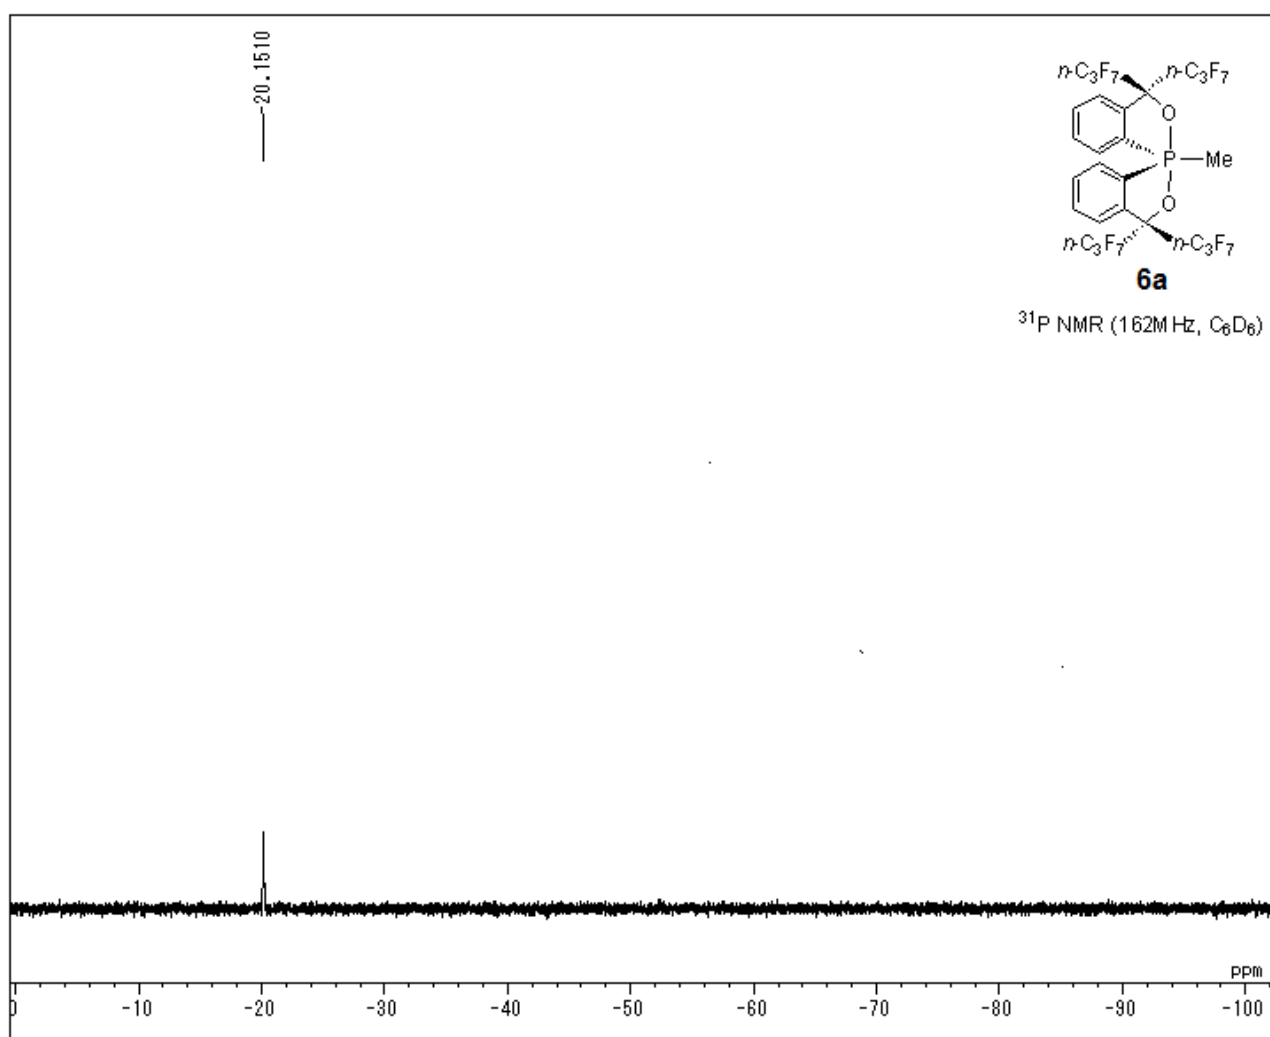

Supplement: c0dt00539h.pdf [file c0dt00539h.pdf]
